# Supplementary material for: Predictors of Postal or Online Response Mode and Associations With Patient Experience and Satisfaction in the English Cancer Patient Experience Survey
Source: PubMed Central journal article supplement (PMC6521193; doi:10.2196/11855), 2019-05-02
Supplement: jmir_v21i5e11855_app1.pdf [file jmir_v21i5e11855_app1.pdf]

| Variable             | n    | %      |
|----------------------|------|--------|
| Age group            |      |        |
| <55                  | 647  | 21.12  |
| 55-64                | 597  | 19.48  |
| 65-74                | 924  | 30.16  |
| ≥75                  | 896  | 29.24  |
| Sex                  |      |        |
| Male                 | 1591 | 51.93  |
| Female               | 1473 | 48.07  |
| IMD score            |      |        |
| Quintile 1           | 803  | 26.21  |
| Quintile 2           | 728  | 23.76  |
| Quintile 3           | 646  | 21.08  |
| Quintile 4           | 530  | 17.30  |
| Quintile 5           | 332  | 10.83  |
| Missing              | 25   | 0.82   |
| Cancer site          |      |        |
| Melanoma             | 1633 | 53.30  |
| Renal <sup>a</sup>   | 938  | 30.61  |
| Thyroid <sup>a</sup> | 493  | 16.09  |
| Total                | 3064 | 100.00 |

<sup>a</sup>Renal and thyroid cancers were grouped into the “other” category.
