# Supplementary material for: Predictors of Postal or Online Response Mode and Associations With Patient Experience and Satisfaction in the English Cancer Patient Experience Survey
Source: PubMed Central journal article supplement (PMC6521193; doi:10.2196/11855), 2019-05-02
Supplement: jmir_v21i5e11855_app3.pdf [file jmir_v21i5e11855_app3.pdf]

| Question and synopsis                                                                      | N      | Overall % of reported satisfied/positive experience | Odds ratio <sup>a</sup> | 95% confidence interval | P value <sup>b</sup> |
|--------------------------------------------------------------------------------------------|--------|-----------------------------------------------------|-------------------------|-------------------------|----------------------|
| Q47 Patient given all info needed about chemotherapy treatment                             | 33,454 | 84.41                                               | 0.78                    | 0.70 - 0.87             | <b>&lt;.001</b>      |
| Q56 Overall rating of administration of care                                               | 61,879 | 89.01                                               | 0.80                    | 0.73 - 0.88             | <b>&lt;.001</b>      |
| Q54 Different people treating and caring work well together                                | 60,147 | 60.45                                               | 0.84                    | 0.78 - 0.89             | <b>&lt;.001</b>      |
| Q33 Doctors and nurses asked what name patient preferred to be called by                   | 38,788 | 66.52                                               | 0.87                    | 0.80 - 0.94             | <b>.001</b>          |
| Q44 Patient given all info needed about radiotherapy treatment                             | 16,558 | 86.02                                               | 0.88                    | 0.74 - 1.04             | .124                 |
| Q31 Patient had confidence and trust in ward nurses                                        | 39,117 | 72.21                                               | 0.88                    | 0.81 - 0.96             | <b>.003</b>          |
| Q8 Patient told they could bring family/friend when first told they had cancer             | 52,096 | 79.08                                               | 0.88                    | 0.82 - 0.96             | <b>.003</b>          |
| Q18 Easy to contact CNS                                                                    | 48,330 | 86.58                                               | 0.89                    | 0.81 - 0.98             | <b>.021</b>          |
| Q35 Patient found hospital staff to talk to about worries and fears during hospital visit  | 28,833 | 52.08                                               | 0.90                    | 0.82 - 0.99             | <b>.028</b>          |
| Q23 Patient told about free prescriptions                                                  | 29,538 | 80.70                                               | 0.91                    | 0.82 - 1.00             | .052                 |
| Q36 Hospital staff did everything they could to help control pain                          | 34,333 | 83.96                                               | 0.91                    | 0.82 - 1.01             | .078                 |
| Q38 Patient given clear written info after leaving hospital                                | 36,697 | 84.55                                               | 0.91                    | 0.82 - 1.02             | .115                 |
| Q52 GP given enough info about patient condition and treatment                             | 52,266 | 95.51                                               | 0.92                    | 0.79 - 1.06             | .246                 |
| Q29 Patient had confidence and trusts in doctors                                           | 39,106 | 84.06                                               | 0.94                    | 0.84 - 1.04             | .204                 |
| Q55 Patient given a care plan                                                              | 48,025 | 32.94                                               | 0.94                    | 0.87 - 1.01             | .090                 |
| Q7 Test results explained in a way patient could understand                                | 53,637 | 78.80                                               | 0.94                    | 0.87 - 1.01             | .111                 |
| Q2 Waiting time before first appointment with hospital doctor                              | 61,529 | 82.25                                               | 0.94                    | 0.87 - 1.02             | .127                 |
| Q17 Patient given the name of CNS                                                          | 60,053 | 90.29                                               | 0.94                    | 0.85 - 1.05             | .300                 |
| Q12 Treatment options explained to patient                                                 | 54,397 | 82.61                                               | 0.95                    | 0.87 - 1.03             | .195                 |
| Q41 Patient found hospital staff to talk about worries and fears as outpatient or day case | 46,824 | 70.18                                               | 0.95                    | 0.88 - 1.02             | .173                 |
| Q15 Patient told about side effects of treatment                                           | 56,469 | 54.20                                               | 0.95                    | 0.89 - 1.01             | .109                 |
| Q21 Hospital staff discussed/gave info about impact of cancer on day to day activities     | 41,729 | 81.07                                               | 0.95                    | 0.87 - 1.04             | .295                 |
| Q37 Patient treated with respect and dignity                                               | 39,086 | 87.51                                               | 0.95                    | 0.85 - 1.07             | .404                 |
| Q34 Patient given enough privacy when discussing condition/treatment                       | 39,051 | 84.75                                               | 0.96                    | 0.86 - 1.06             | .391                 |
| Q57 Waiting time when attending clinics and appointments for cancer treatment              | 61,369 | 65.73                                               | 0.96                    | 0.90 - 1.02             | .220                 |
| Q9 How patient was told they had cancer                                                    | 62,079 | 84.15                                               | 0.96                    | 0.89 - 1.04             | .360                 |
| Q32 Enough nurses on duty to care for patient in hospital                                  | 38,943 | 65.84                                               | 0.96                    | 0.89 - 1.05             | .383                 |
| Q1 How many times patient saw GP before told had to go to hospital                         | 46,107 | 75.46                                               | 0.96                    | 0.89 - 1.05             | .395                 |
| Q10 Patient understood the explanation of what was wrong with them                         | 62,283 | 72.68                                               | 0.97                    | 0.90 - 1.03             | .322                 |
| Q22 Patient given info about financial helps and benefits                                  | 33,276 | 55.32                                               | 0.97                    | 0.89 - 1.05             | .456                 |

|                                                                                               |        |       |      |             |                 |
|-----------------------------------------------------------------------------------------------|--------|-------|------|-------------|-----------------|
| Q48 Patient given enough info about whether chemotherapy was working                          | 30,433 | 67.82 | 0.97 | 0.89 - 1.07 | .555            |
| Q45 Patient given enough info about whether radiotherapy was working                          | 14,080 | 59.34 | 0.98 | 0.86 - 1.12 | .735            |
| Q11 Patient given written info about type of cancer                                           | 54,868 | 71.61 | 0.98 | 0.91 - 1.05 | .562            |
| Q14 Patient offered advice and support in dealing with side effects                           | 59,744 | 66.27 | 0.99 | 0.93 - 1.06 | .840            |
| Q26 Member of staff explained how operation had gone                                          | 32,975 | 77.43 | 1.01 | 0.91 - 1.11 | .901            |
| Q16 Patient involved in decisions about care and treatment                                    | 60,325 | 77.59 | 1.01 | 0.94 - 1.08 | .857            |
| Q13 Side effects of treatment(s) explained to patient                                         | 60,115 | 72.82 | 1.02 | 0.95 - 1.09 | .630            |
| Q6 Waiting time for test to be done                                                           | 53,505 | 86.71 | 1.02 | 0.93 - 1.12 | .689            |
| Q20 Patient given info about support or self-help groups                                      | 46,879 | 83.25 | 1.02 | 0.93 - 1.13 | .642            |
| Q39 Patient told who to contact if worried about condition or treatment                       | 37,664 | 93.91 | 1.04 | 0.87 - 1.23 | .679            |
| Q51 Patient given enough care and support from health/social services once treatment finished | 19,365 | 44.43 | 1.04 | 0.93 - 1.16 | .506            |
| Q53 GPs and nurses did everything to support while patient had cancer treatment               | 43,561 | 62.41 | 1.04 | 0.97 - 1.12 | .310            |
| Q30 Family/someone close to patient able to talk to a doctor                                  | 32,567 | 71.91 | 1.04 | 0.95 - 1.14 | .422            |
| Q42 Cancer doctor had the right documents at outpatients appointment                          | 55,067 | 95.63 | 1.05 | 0.90 - 1.23 | .543            |
| Q50 Patient given enough care and support from health/social services during treatment        | 33,215 | 53.68 | 1.06 | 0.98 - 1.16 | .162            |
| Q58 Patient asked to take part in cancer research                                             | 59,430 | 28.89 | 1.06 | 0.99 - 1.14 | .072            |
| Q49 Doctors and nurses gave family/someone close to patient all info to help care at home     | 50,433 | 57.43 | 1.09 | 1.01 - 1.16 | <b>.018</b>     |
| Q19 Patient understood answers to important questions from CNS                                | 46,283 | 88.61 | 1.11 | 0.99 - 1.24 | .063            |
| Q59 Overall rating of care                                                                    | 60,921 | 63.84 | 1.24 | 1.16 - 1.32 | <b>&lt;.001</b> |
| Q28 Doctors and nurses talked in front of patient as if they weren't there                    | 39,018 | 81.52 | 1.27 | 1.14 - 1.42 | <b>&lt;.001</b> |

<sup>a</sup> Odds ratios of reporting a satisfied/positive experience for online versus postal responders from multivariate logistic regression models, adjusted for age group, sex, ethnic group, social deprivation, and cancer site variables.

<sup>b</sup> *P* value from Wald tests, highlighted at 5% level.
