# Supplementary material for: Predictors of Postal or Online Response Mode and Associations With Patient Experience and Satisfaction in the English Cancer Patient Experience Survey
Source: PubMed Central journal article supplement (PMC6521193; doi:10.2196/11855), 2019-05-02
Supplement: jmir_v21i5e11855_app6.pdf [file jmir_v21i5e11855_app6.pdf]

| Variable                 | Odds ratio <sup>a</sup> | 95% confidence interval | <i>P</i> value <sup>b</sup> |
|--------------------------|-------------------------|-------------------------|-----------------------------|
| Response mode            |                         |                         |                             |
| Postal                   | 1                       |                         |                             |
| Online                   | 1.27                    | 1.15 - 1.39             | <.001                       |
| Interaction              |                         |                         |                             |
| Online # female          | 0.85                    | 0.75 - 0.97             | <.001                       |
| Online # nonwhite        | 1.56                    | 1.28 - 1.91             | <.001                       |
| Sex                      |                         |                         |                             |
| Male                     | 1                       |                         |                             |
| Female                   | 0.89                    | 0.86 - 0.93             | <.001                       |
| Age group                |                         |                         |                             |
| <55                      | 0.75                    | 0.71 - 0.79             |                             |
| 55-64                    | 0.84                    | 0.81 - 0.88             |                             |
| 65-74                    | 1                       |                         | <.001                       |
| 75+                      | 0.97                    | 0.93 - 1.01             |                             |
| IMD score                |                         |                         |                             |
| Quintile 1               | 1                       |                         |                             |
| Quintile 2               | 1.02                    | 0.97 - 1.07             |                             |
| Quintile 3               | 1.01                    | 0.96 - 1.06             | <.001                       |
| Quintile 4               | 0.92                    | 0.87 - 0.97             |                             |
| Quintile 5               | 0.95                    | 0.89 - 1.00             |                             |
| Ethnic group             |                         |                         |                             |
| White                    | 1                       |                         |                             |
| Nonwhite                 | 0.60                    | 0.56 - 0.64             | <.001                       |
| Cancer site <sup>c</sup> |                         |                         |                             |
| Non-Hodgkin lymphoma     | 1.38                    | 1.25 - 1.52             |                             |
| Leukemia                 | 1.35                    | 1.20 - 1.52             |                             |
| Breast                   | 1.30                    | 1.19 - 1.42             |                             |
| Endometrial              | 1.21                    | 1.06 - 1.39             |                             |
| Colon                    | 1.05                    | 0.95 - 1.15             |                             |
| Rectal                   | 1                       |                         | <.001                       |
| Multiple myeloma         | 0.99                    | 0.90 - 1.09             |                             |
| Other                    | 0.96                    | 0.89 - 1.04             |                             |
| Lung                     | 0.92                    | 0.83 - 1.02             |                             |
| Bladder                  | 0.86                    | 0.78 - 0.95             |                             |
| Prostate                 | 0.86                    | 0.78 - 0.94             |                             |

<sup>a</sup> Adjusted odds ratios of reporting a satisfied experience from a multivariable logistic regression model, conditional on response mode, patient characteristic and cancer site variables, as well as pairwise interaction terms for response mode with sex and ethnic group.

<sup>b</sup> *P* values from joint Wald tests.

<sup>c</sup> Responders with renal and thyroid cancers (grouped into the “other” category) and melanoma skin cancer excluded due to their ethnic group being suppressed or missing.
