# Supplementary material for: Predictors of Postal or Online Response Mode and Associations With Patient Experience and Satisfaction in the English Cancer Patient Experience Survey
Source: PubMed Central journal article supplement (PMC6521193; doi:10.2196/11855), 2019-05-02
Supplement: jmir_v21i5e11855_app7.pdf [file jmir_v21i5e11855_app7.pdf]

a. Postal questionnaire

**59.** Overall, how would you rate your care?  
**(Please circle a number)**

Very poor Very good

0 1 2 3 4 5 6 7 8 9 10

b. Online questionnaire (taken from the demo version of the 2017 online questionnaire with identical format to the 2015 questionnaire)

**59.** Overall, how would you rate your care?

Very poor Very good

0 1 2 3 4 5 6 7 8 9 10
